# Supplementary material for: Resident and phytometer plants host comparable rhizosphere fungal communities in managed grassland ecosystems
Source: PubMed Central journal article supplement (PMC6976665; doi:10.1038/s41598-020-57760-x), 2020-01-22
Supplement: 41598_2020_57760_MOESM1_ESM.pdf [file 41598_2020_57760_MOESM1_ESM.pdf]

## 1 **Supplementary information**

2 **Authors:** Ricardo Schöps<sup>1,2,\*</sup>, Kezia Goldmann<sup>1</sup>, Lotte Korell<sup>3,4,5</sup>, Helge Bruelheide<sup>3,5</sup>, Tesfaye Wubet<sup>4,5</sup> & François  
3 Buscot<sup>1,5</sup>

4 **Title:** Resident and phytometer plants host comparable rhizosphere fungal communities in managed grassland  
5 ecosystems

### 6 **Author affiliation:**

7 <sup>1</sup>UFZ – Helmholtz Centre for Environmental Research, Department of Soil Ecology, Theodor-Lieser-Straße 4, 06120  
8 Halle/Saale, Germany

9 <sup>2</sup>University of Leipzig, Department of Biology II, Johannisallee 21, 04103 Leipzig, Germany

10 <sup>3</sup>Martin Luther University Halle-Wittenberg, Institute of Biology/Geobotany and Botanical Garden, Am Kirchtor 1,  
11 06108 Halle/Saale, Germany

12 <sup>4</sup>UFZ – Helmholtz-Centre for Environmental Research, Department of Community Ecology, Theodor-Lieser-Straße  
13 4, 06120 Halle/Saale, Germany

14 <sup>5</sup>German Centre for Integrative Biodiversity Research (iDiv) Halle-Jena-Leipzig, Deutscher Platz 5e, 04103 Leipzig,  
15 Germany

16 **\*Correspondence:** Ricardo Schöps; schoeps.ric@gmail.com

17 **Supplementary Table S1.** Diversity indices for fungal communities. Strong differences are indicated in bold ( $P <$   
 18 0.05). Soil type nested in experimental plot was the random factor

|               | Richness |          |              | ACE   |          |              | Shannon |          |          | Evenness |          |              |
|---------------|----------|----------|--------------|-------|----------|--------------|---------|----------|----------|----------|----------|--------------|
|               | df       | <i>F</i> | <i>P</i>     | df    | <i>F</i> | <i>P</i>     | df      | <i>F</i> | <i>P</i> | df       | <i>F</i> | <i>P</i>     |
| LUI           | 1, 13    | 1.475    | 0.246        | 1, 13 | 1.375    | 0.262        | 1, 13   | 1.127    | 0.308    | 1, 13    | 0.105    | 0.751        |
| Plant species | 1, 39    | 8.389    | <b>0.006</b> | 1, 39 | 10.111   | <b>0.003</b> | 1, 39   | 3.538    | 0.067    | 1, 39    | 1.043    | 0.314        |
| Plant type    | 1, 39    | 1.846    | 0.182        | 1, 39 | 2.950    | 0.094        | 1, 39   | 0.915    | 0.345    | 1, 39    | 0.282    | 0.598        |
| Species:Type  | 1, 39    | 0.495    | 0.486        | 1, 39 | 0.687    | 0.412        | 1, 39   | 3.356    | 0.075    | 1, 39    | 5.702    | <b>0.022</b> |
| Observations  | 52       |          |              | 52    |          |              | 52      |          |          | 52       |          |              |
| Marg. $R^2$   | 0.17     |          |              | 0.20  |          |              | 0.15    |          |          | 0.11     |          |              |
| Cond. $R^2$   | 0.38     |          |              | 0.41  |          |              | 0.19    |          |          | 0.26     |          |              |

19 LUI, land-use intensity; Plant species, *Dactylis glomerata* versus *Plantago lanceolata*; Plant type, resident plants  
 20 versus phytometer plants; ACE, Abundance-based coverage estimator; Species:Type, Plant species:plant type; df,  
 21 degrees of freedom numerator and degrees of freedom denominator; *F* and *P*, *F*-value and *P*-value. Marginal  $R^2$   
 22 (marg.) indicates how much variance is explained in the model without random factors, conditional  $R^2$  (cond.) is how  
 23 much variance is explained by the model including random factors

24 **Supplementary Table S2.** The first 50 fungal genera that contribute the most to the observed pairwise variation in  
 25 the composition of the rhizosphere mycobiomes of the different plant types based on analysis of percentage  
 26 similarity (SIMPER). The top 30 fungal genera are highlighted in grey which add up together with unclassified fungi  
 27 to a total of 76 % of the observed dissimilarities

| Overall average dissimilarity = 53 % |              |                         |                       |
|--------------------------------------|--------------|-------------------------|-----------------------|
| Fungal genus                         | Contribution | Abundance<br>Phytometer | Abundance<br>Resident |
| unclassified                         | 12.34        | 0.30                    | 0.30                  |
| <i>Mortierella</i>                   | 9.15         | 0.10                    | 0.09                  |
| <i>Mycosphaerella</i>                | 6.30         | 0.06                    | 0.08                  |
| <i>Cryptococcus</i>                  | 5.63         | 0.07                    | 0.08                  |
| <i>Camarophylloopsis</i>             | 3.45         | 0.01                    | 0.03                  |
| <i>Gibberella</i>                    | 3.12         | 0.03                    | 0.02                  |
| <i>Monographella</i>                 | 3.07         | 0.01                    | 0.03                  |
| <i>Ramariopsis</i>                   | 2.32         | 0.01                    | 0.02                  |
| <i>Conocybe</i>                      | 2.32         | 0.02                    | 0.01                  |
| <i>Trichosporon</i>                  | 2.31         | 0.02                    | 0.01                  |
| <i>Preussia</i>                      | 2.02         | 0.02                    | 0.01                  |
| <i>Holtermannia</i>                  | 1.89         | 0.02                    | 0.02                  |
| <i>Clavulinopsis</i>                 | 1.86         | 0.01                    | 0.01                  |
| <i>Didymella</i>                     | 1.81         | 0.02                    | 0.02                  |
| <i>Serendipita</i>                   | 1.71         | 0.02                    | 0.01                  |
| <i>Tricholoma</i>                    | 1.69         | 0.02                    | 0.00                  |
| <i>Coprinopsis</i>                   | 1.42         | 0.01                    | 0.01                  |
| <i>Auricularia</i>                   | 1.35         | 0.01                    | 0.01                  |
| <i>Paraphoma</i>                     | 1.31         | 0.01                    | 0.01                  |
| <i>Mycena</i>                        | 1.26         | 0.00                    | 0.01                  |
| <i>Hygrocybe</i>                     | 1.04         | 0.00                    | 0.01                  |
| <i>Cystofilobasidium</i>             | 1.04         | 0.01                    | 0.01                  |
| <i>Tetracladium</i>                  | 1.03         | 0.01                    | 0.01                  |
| <i>Clavaria</i>                      | 1.00         | 0.00                    | 0.01                  |
| <i>Calyptella</i>                    | 0.99         | 0.01                    | 0.00                  |
| <i>Heteroconium</i>                  | 0.91         | 0.01                    | 0.01                  |
| <i>Entoloma</i>                      | 0.86         | 0.01                    | 0.00                  |
| <i>Pyrenochaetopsis</i>              | 0.86         | 0.01                    | 0.01                  |
| <i>Ceratobasidium</i>                | 0.85         | 0.00                    | 0.01                  |
| <i>Articulospora</i>                 | 0.76         | 0.01                    | 0.01                  |
| <i>Deconica</i>                      | 0.69         | 0.01                    | 0.00                  |
| <i>Stropharia</i>                    | 0.69         | 0.00                    | 0.01                  |
| <i>Rhizophlyctis</i>                 | 0.62         | 0.00                    | 0.00                  |
| <i>Hannaella</i>                     | 0.60         | 0.01                    | 0.00                  |
| <i>Dioszegia</i>                     | 0.60         | 0.01                    | 0.01                  |
| <i>Metarhizium</i>                   | 0.55         | 0.01                    | 0.00                  |
| <i>Podospora</i>                     | 0.55         | 0.00                    | 0.00                  |
| <i>Exophiala</i>                     | 0.55         | 0.01                    | 0.01                  |
| <i>Cuphophyllus</i>                  | 0.52         | 0.00                    | 0.01                  |
| <i>Septoria</i>                      | 0.50         | 0.00                    | 0.00                  |
| <i>Schwanniomyces</i>                | 0.47         | 0.00                    | 0.00                  |
| <i>Thanatephorus</i>                 | 0.48         | 0.00                    | 0.00                  |
| <i>Coprinus</i>                      | 0.45         | 0.00                    | 0.00                  |
| <i>Pyrenochaeta</i>                  | 0.44         | 0.00                    | 0.00                  |
| <i>Chaetosphaeronema</i>             | 0.41         | 0.00                    | 0.00                  |
| <i>Lecythophora</i>                  | 0.41         | 0.00                    | 0.00                  |
| <i>Mycocentrospora</i>               | 0.39         | 0.00                    | 0.00                  |
| <i>Myrothecium</i>                   | 0.37         | 0.00                    | 0.00                  |
| <i>Colletotrichum</i>                | 0.35         | 0.00                    | 0.00                  |
| <i>Meliniomyces</i>                  | 0.35         | 0.00                    | 0.00                  |

28

29 **Supplementary Table S3.** The ‘winner’, ‘mid-specialists’, and ‘losers’ of intensive land-use of the top 30 fungal  
 30 genera

| Trophic mode | Genera                                | Total    | Phytometer |          | Resident |          |
|--------------|---------------------------------------|----------|------------|----------|----------|----------|
|              |                                       |          | Da.gl      | Pl.la    | Da.gl    | Pl.la    |
| Sym          | <sup>B</sup> <i>Serendipita</i>       | neutral  | neutral    | neutral  | neutral  | neutral  |
| Sap          | <sup>B</sup> <i>Calyptrella</i>       | winner   | neutral    | neutral  | neutral  | neutral  |
| Sap          | <sup>B</sup> <i>Auricularia</i>       | neutral  | neutral    | neutral  | neutral  | neutral  |
| Sap          | <sup>B</sup> <i>Coprinopsis</i>       | neutral  | neutral    | neutral  | neutral  | neutral  |
| Sap          | <sup>A</sup> <i>Preussia</i>          | neutral  | neutral    | neutral  | neutral  | neutral  |
| Sap          | <sup>A</sup> <i>Articulospora</i>     | neutral  | neutral    | neutral  | neutral  | neutral  |
| Sap          | <sup>A</sup> <i>Heteroconium</i>      | neutral  | neutral    | neutral  | neutral  | neutral  |
| Sap          | <sup>B</sup> <i>Conocybe</i>          | neutral  | neutral    | winner   | neutral  | winner   |
| Sap          | <sup>B</sup> <i>Cystofilobasidium</i> | neutral  | neutral    | neutral  | neutral  | mid-spec |
| Sap          | <sup>A</sup> <i>Tetracladium</i>      | mid-spec | neutral    | neutral  | neutral  | neutral  |
| Sap          | <sup>B</sup> <i>Clavulinopsis</i>     | neutral  | neutral    | loser    | neutral  | mid-spec |
| Sap          | <sup>B</sup> <i>Clavaria</i>          | loser    | mid-spec   | neutral  | loser    | loser    |
| Sap          | <sup>B</sup> <i>Deconica</i>          | neutral  | neutral    | neutral  | neutral  | neutral  |
| Sap          | <sup>B</sup> <i>Ramariopsis</i>       | loser    | loser      | loser    | loser    | loser    |
| Sap          | <sup>B</sup> <i>Camarophylloopsis</i> | loser    | loser      | neutral  | loser    | loser    |
| Pat          | <sup>A</sup> <i>Paraphoma</i>         | winner   | winner     | neutral  | neutral  | winner   |
| Pat          | <sup>A</sup> <i>Monographella</i>     | winner   | winner     | winner   | neutral  | neutral  |
| Pat          | <sup>A</sup> <i>Gibberella</i>        | mid-spec | neutral    | neutral  | neutral  | neutral  |
| Pat          | <sup>A</sup> <i>Mycosphaerella</i>    | neutral  | neutral    | neutral  | neutral  | neutral  |
| Pat          | <sup>B</sup> <i>Trichosporon</i>      | neutral  | neutral    | loser    | neutral  | neutral  |
| Sap/Sym      | <sup>M</sup> <i>Mortierella</i>       | neutral  | neutral    | neutral  | neutral  | neutral  |
| Sap/Sym      | <sup>B</sup> <i>Hygrocybe</i>         | loser    | neutral    | neutral  | neutral  | neutral  |
| Pat/Sym      | <sup>B</sup> <i>Tricholoma</i>        | neutral  | neutral    | neutral  | neutral  | neutral  |
| Pat/Sap      | <sup>A</sup> <i>Didymella</i>         | mid-spec | neutral    | mid-spec | mid-spec | neutral  |
| Pat/Sap      | <sup>B</sup> <i>Mycena</i>            | loser    | neutral    | loser    | mid-spec | mid-spec |
| Pat/Sap/Sym  | <sup>B</sup> <i>Entoloma</i>          | neutral  | neutral    | neutral  | winner   | neutral  |
| Pat/Sap/Sym  | <sup>B</sup> <i>Ceratobasidium</i>    | neutral  | neutral    | neutral  | neutral  | neutral  |
| Pat/Sap/Sym  | <sup>B</sup> <i>Cryptococcus</i>      | neutral  | mid-spec   | neutral  | neutral  | neutral  |
| Pat/Sap/Sym  | <sup>A</sup> <i>Pyrenochaetopsis</i>  | neutral  | neutral    | neutral  | neutral  | neutral  |
| unknown      | <sup>B</sup> <i>Holtermannia</i>      | neutral  | mid-spec   | neutral  | neutral  | neutral  |

31 The abundance-weighted means ( $\mu_{j,obs}$ ) and standard deviations ( $\sigma_{j,obs}$ ) of land-use intensity (LUI; consisting of the  
 32 land-use elements grazing, mowing, and fertilization) were calculated for each of the top 30 fungal genera. A fungal  
 33 genus was termed ‘loser’ of intensive land-use when the  $\mu_{j,obs}$  was significantly smaller than the expected ( $\mu_{j,exp}$ ;  $P <$   
 34  $0.05$ ) by the null model with a randomization approach (10,000 iterations). In turn, a ‘winner’ had a significantly  
 35 higher  $\mu_{j,obs}$  than  $\mu_{j,exp}$  ( $P < 0.05$ ). In addition, fungal genera with a smaller observed weighted coefficient of variation  
 36 than expected ( $CV_{j,obs} = \sigma_{j,obs}/\mu_{j,obs} < CV_{j,exp} = \sigma_{j,exp}/\mu_{j,exp}$ ) and  $\mu_{j,obs} = \mu_{j,exp}$  ( $P > 0.05$ ) were named ‘mid-specialists’  
 37 (mid-spec). Intensive land-use showed no influence on fungal genera that were termed ‘neutral’. Da.gl, *Dactylis*  
 38 *glomerata*; Pl.la, *Plantago lanceolata*; Fungal trophic modes: Sym – symbiotroph, Sap – saprotroph, Pat –  
 39 pathotroph, Sap/Sym – saprotroph/symbiotroph, Pat/Sap – pathotroph/saprotroph, Pat/Sap/Sym – pathotroph /  
 40 saprotroph/symbiotroph; <sup>A</sup>, ascomycetous genus; <sup>B</sup>, basidiomycetous genus; <sup>M</sup>, Mortierellomycota

41 **Supplementary Table S4.** Information to environmental variables of the 13 experimental plots (EPs).

| EP    | LUI index | Land-use elements |      |      | Soil type | Elevation | Slope | rH     | SM     | Ta 10  | Ta 200 |
|-------|-----------|-------------------|------|------|-----------|-----------|-------|--------|--------|--------|--------|
|       |           | G                 | M    | F    |           |           |       |        |        |        |        |
| AEG01 | 1.79      | 0.00              | 1.73 | 1.46 | Leptosol  | 691.03    | 2.85  | 85.344 | 29.464 | 10.080 | 9.049  |
| AEG05 | 1.77      | 0.98              | 0.82 | 1.33 | Leptosol  | 717.79    | 2.79  | 89.677 | 46.892 | 10.502 | 9.192  |
| AEG08 | 1.32      | 1.02              | 0.73 | 0.00 | Leptosol  | 760.28    | 3.74  | 81.701 | 42.280 | 10.769 | 9.307  |
| AEG15 | 2.44      | 0.00              | 2.45 | 3.51 | Leptosol  | 746.77    | 6.81  | 82.233 | 46.107 | 11.291 | 9.789  |
| AEG16 | 1.62      | 1.01              | 1.09 | 0.52 | Leptosol  | 723.85    | 5.82  | 87.195 | 37.725 | 10.977 | 9.403  |
| AEG18 | 2.18      | 0.00              | 2.09 | 2.65 | Leptosol  | 765.07    | 3.76  | 80.877 | 42.416 | 10.588 | 9.360  |
| AEG21 | 3.62      | 8.18              | 0.27 | 4.64 | Leptosol  | 732.75    | 3.02  | 82.851 | 38.738 | 10.261 | 9.671  |
| AEG22 | 1.25      | 0.35              | 0.82 | 0.38 | Leptosol  | 796.64    | 8.47  | 85.571 | 46.639 | 10.455 | 9.426  |
| AEG31 | 1.36      | 1.29              | 0.55 | 0.00 | Leptosol  | 728.03    | 8.12  | 90.922 | 37.066 | 10.473 | 9.827  |
| AEG33 | 1.32      | 1.75              | 0.00 | 0.00 | Leptosol  | 801.64    | 5.20  | 82.340 | 45.013 | 10.321 | 9.309  |
| AEG38 | 1.35      | 0.00              | 1.64 | 0.19 | Cambisol  | 815.76    | 1.73  | 80.484 | 46.824 | 11.099 | 9.912  |
| AEG44 | 1.86      | 3.45              | 0.00 | 0.00 | Cambisol  | 682.37    | 13.88 | 89.603 | 49.107 | 10.395 | 9.209  |
| AEG45 | 1.38      | 0.00              | 1.82 | 0.09 | Cambisol  | 733.72    | 4.32  | 86.149 | 44.665 | 10.167 | 9.037  |

42 LUI, land-use intensity for the interval 2006-2014 and for the calculation see Methods: Site description; land-use  
43 elements: F – fertilization level ( $\text{kg N ha}^{-1}\text{yr}^{-1}$ ), M – mowing frequency ( $\text{cuts yr}^{-1}$ ), G – grazing intensity (livestock  
44 units days of grazing  $\text{ha}^{-1}\text{yr}^{-1}$ ); soil type, according to the Food and Agriculture Organization (FAO) soil  
45 classification system; rH, percentage of relative humidity (0-100 %) in 200 cm aboveground; SM, percentage of soil  
46 moisture (volumetric water content) in 10 cm depth; Ta 10, air temperature in 10 cm aboveground (degree Celcius, -  
47  $40^{\circ}\text{C}$  to  $60^{\circ}\text{C}$ ); Ta 200, air temperature in 200 cm aboveground (degree Celcius,  $-40^{\circ}\text{C}$  to  $60^{\circ}\text{C}$ ).

48 **Supplementary Table S5.** The CSV table contains the unrarefied operational taxonomic unit table with taxonomic  
49 assignment used for this study.

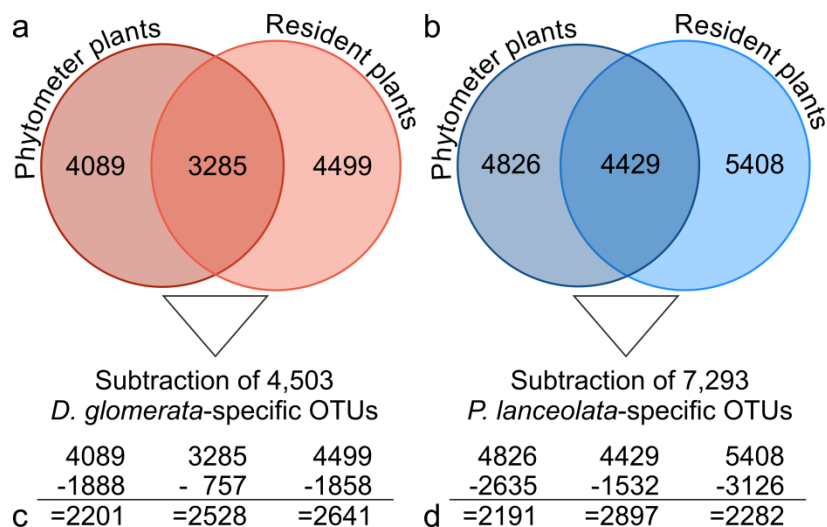

50 **c** =2201 =2528 =2641 **d** =2191 =2897 =2282

51 **Supplementary Figure S1.** Numbers of fungal OTUs in the rhizosphere of **a** *Dactylis glomerata* and **b** *Plantago*  
52 *lanceolata* shared between the plant types (phytometer vs. resident plants). The plant species-specific OTUs (see Fig.  
53 1b) of **c** *D. glomerata* (4,503 OTUs) and **d** *P. lanceolata* (7,293 OTUs) were subtracted from the phytometer plant,  
54 resident plant, and shared sets. The remaining OTUs occurred in the rhizosphere of both plant species.

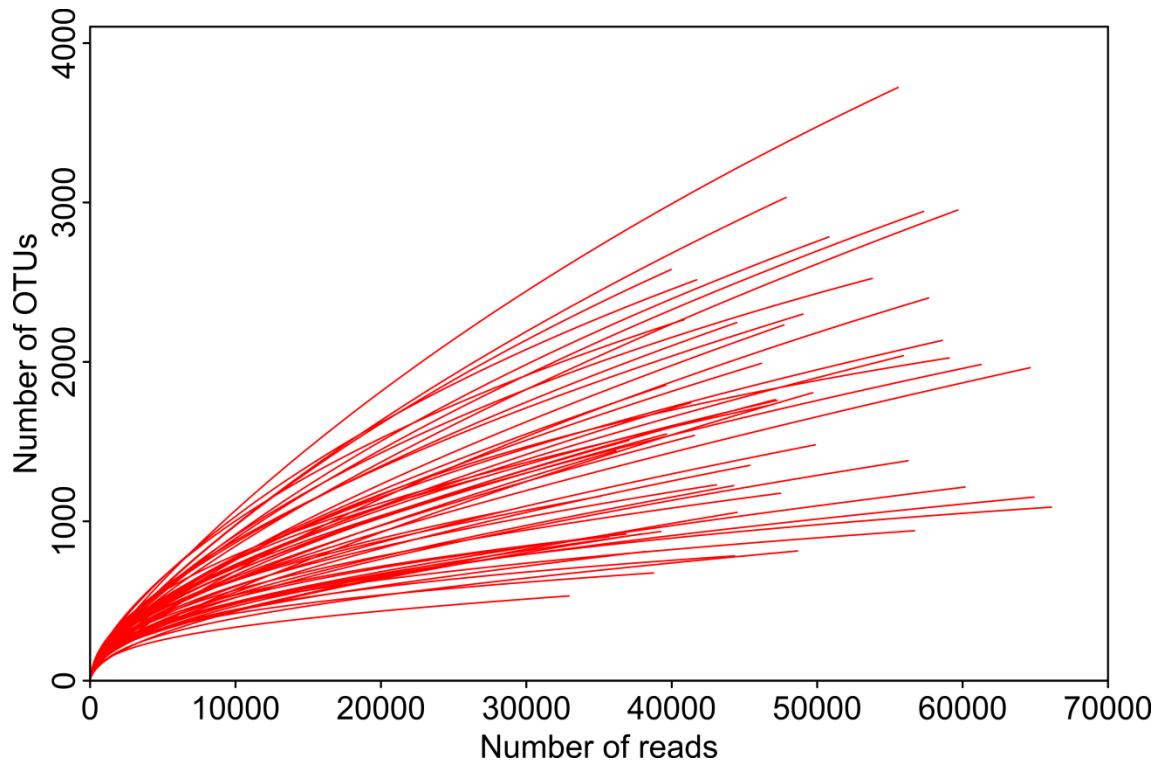

55

56 **Supplementary Figure S2.** Rarefaction curves illustrating the relationship between number of reads per sample and  
57 fungal species richness in operational taxonomic units (OTUs)
